# Supplementary material
Source: Royal Society of Chemistry journal article supplement (doi:10.1039/d5fd00119f)
Supplement: d5fd00119f1.pdf [file d5fd00119f1.pdf]

**Supporting Information for:**

**What can Raman spectroscopy really say  
about the adsorbed CO on roughened Cu  
electrodes in CO<sub>2</sub> electroreduction  
conditions?**

Yu Wei<sup>1</sup> and Anastassia N. Alexandrova<sup>1,2,\*</sup>

*<sup>1</sup>Department of Chemistry and Biochemistry, <sup>2</sup>Department of Materials Science and  
Engineering, University of California, Los Angeles, USA, 90095*

Corresponding author's email: [alexandrova@g.ucla.edu](mailto:alexandrova@g.ucla.edu)

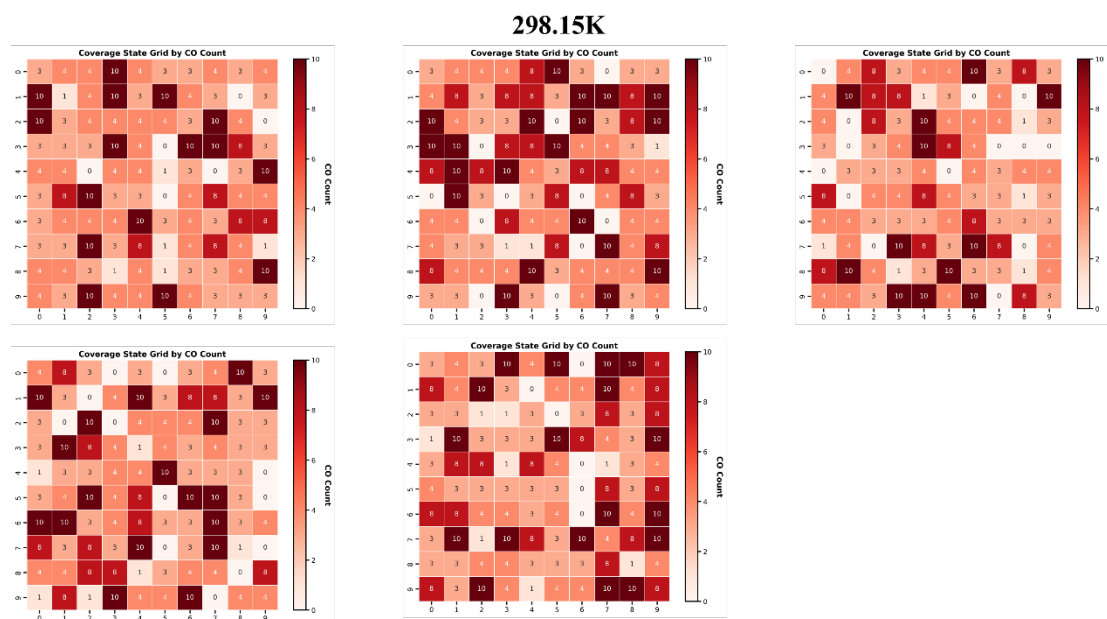

**Figure 1S.** Final configuration distributions obtained from KMC simulations at **298.15 K** under an applied potential of  $-1.1 V_{\text{RHE}}$ . Five independent simulations were performed, they show the final states from each run. Each grid cell represents a distinct surface structure, with the number inside indicating the count of adsorbed \*CO molecules. Darker colors correspond to higher \*CO coverages.

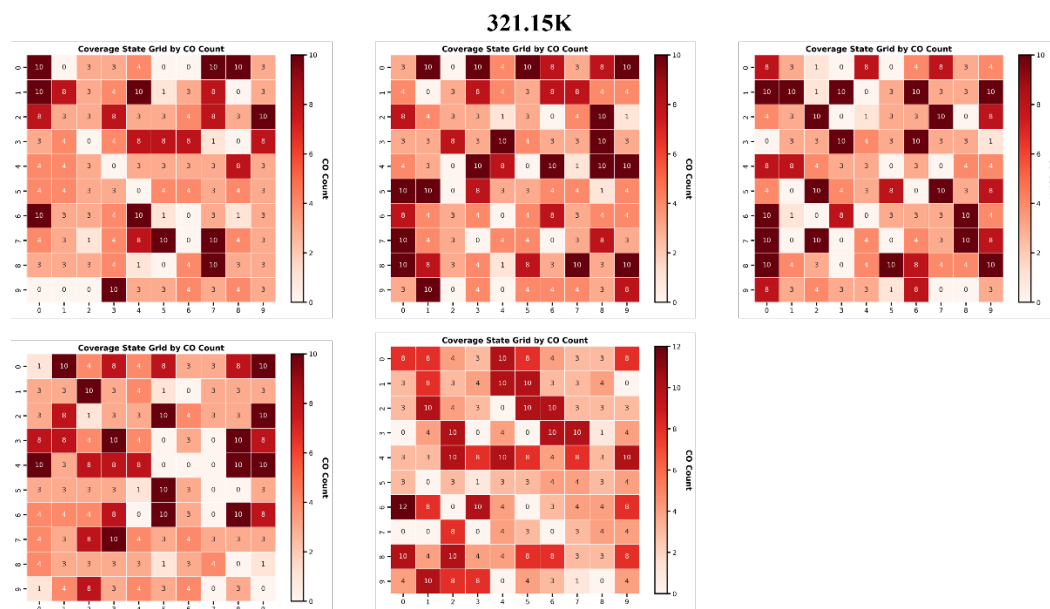

**Figure 2S.** Final configuration distributions obtained from KMC simulations at **321.15 K** under an applied potential of  $-1.1 V_{\text{RHE}}$ . Five independent simulations were performed, they show the final states from each run. Each grid cell represents a distinct surface structure, with the number inside indicating the count of adsorbed \*CO molecules. Darker colors correspond to higher \*CO coverages.

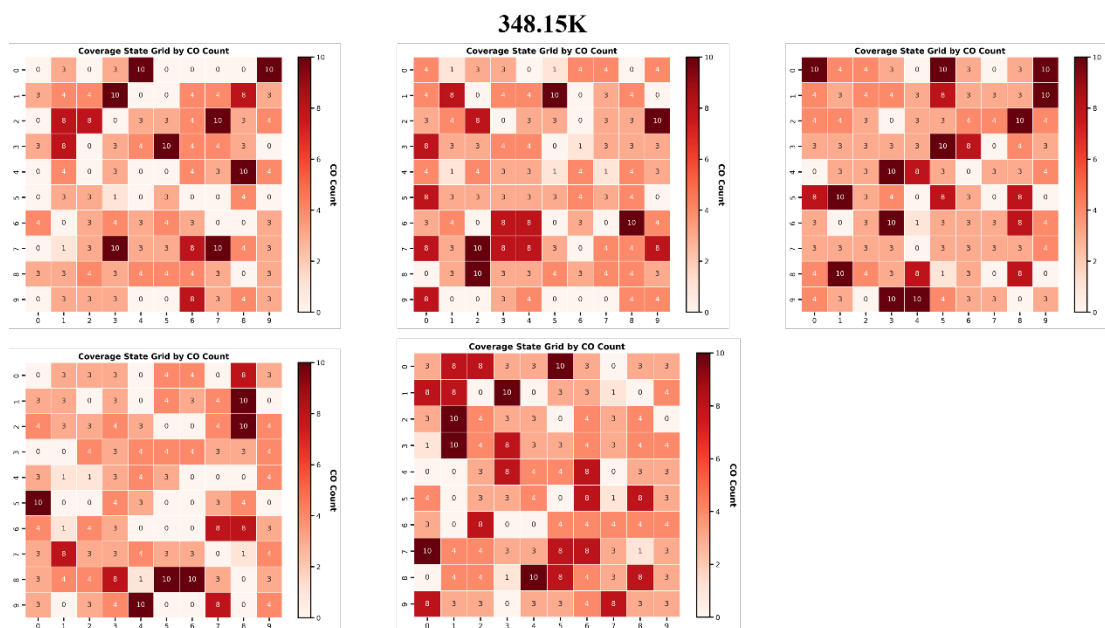

**Figure 3S.** Final configuration distributions obtained from KMC simulations at **348.15 K** under an applied potential of  $-1.1 V_{\text{RHE}}$ . Five independent simulations were performed, they show the final states from each run. Each grid cell represents a distinct surface structure, with the number inside indicating the count of adsorbed \*CO molecules. Darker colors correspond to higher \*CO coverages.

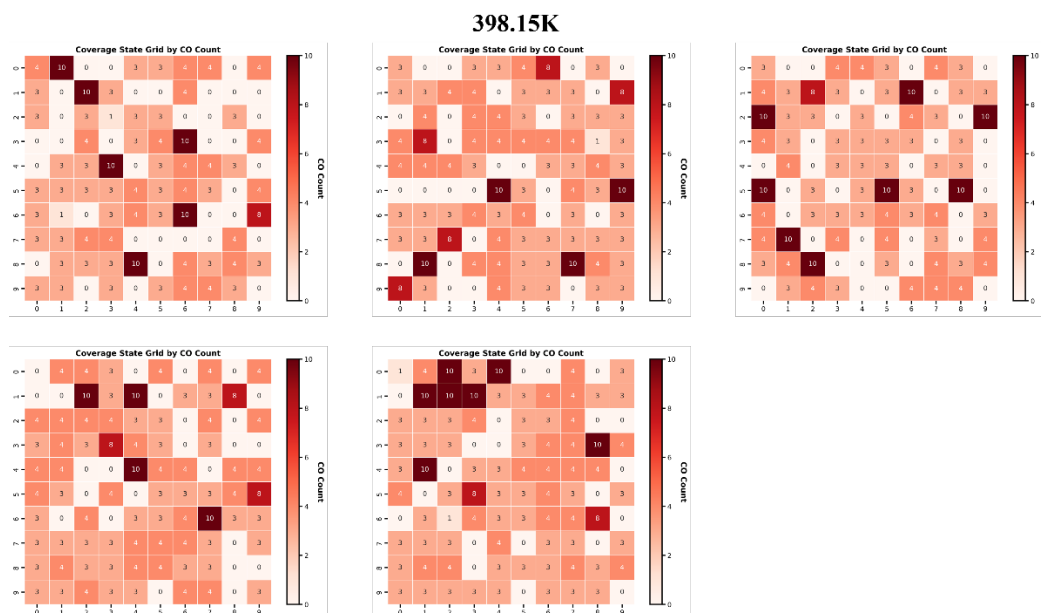

**Figure 4S.** Final configuration distributions obtained from KMC simulations at **398.15 K** under an applied potential of  $-1.1 V_{\text{RHE}}$ . Five independent simulations were performed, they show the final states from each run. Each grid cell represents a distinct surface structure, with the number inside indicating the count of adsorbed \*CO molecules. Darker colors correspond to higher \*CO coverages.

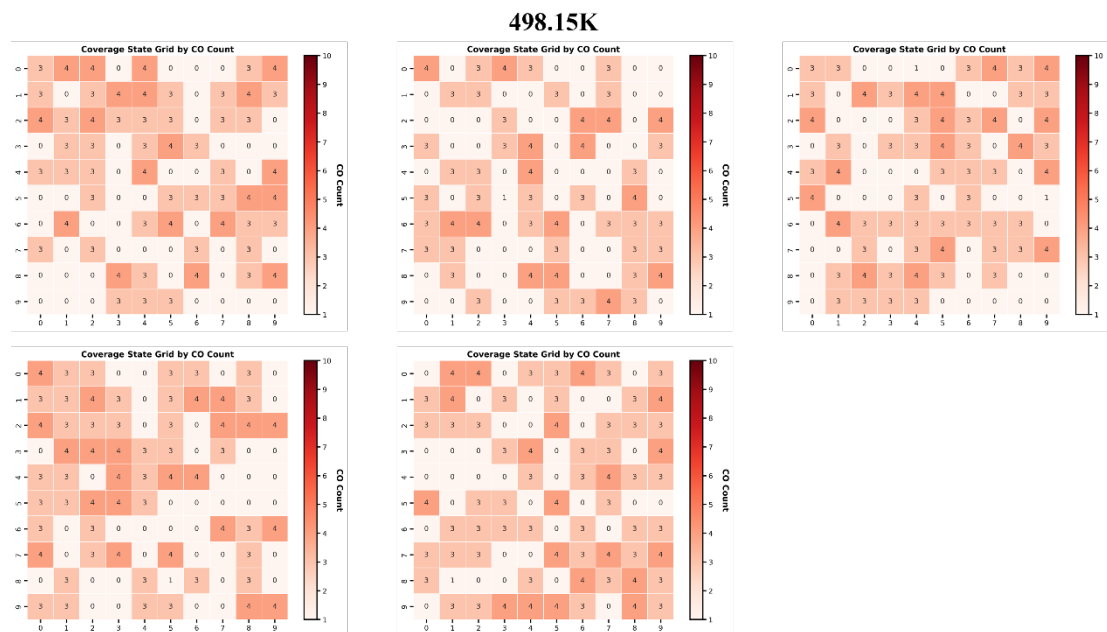

**Figure 5S.** Final configuration distributions obtained from KMC simulations at 498.15 K under an applied potential of  $-1.1 V_{\text{RHE}}$ . Five independent simulations were performed, they show the final states from each run. Each grid cell represents a distinct surface structure, with the number inside indicating the count of adsorbed \*CO molecules. Darker colors correspond to higher \*CO coverages.

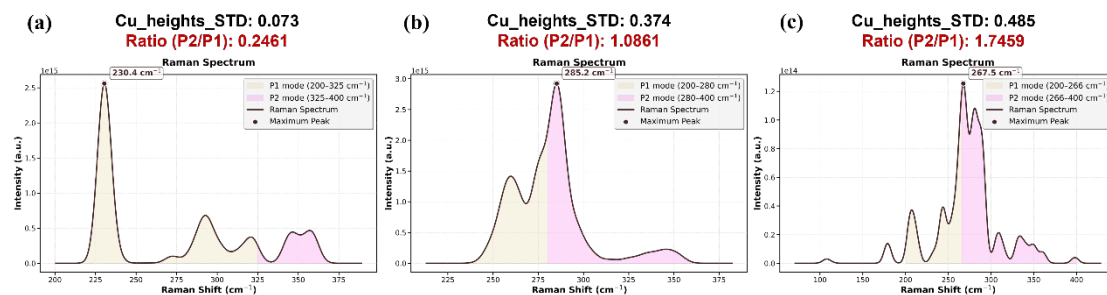

**Figure 6S.** Raman spectra for the three structures shown in Figure 2, each exhibiting different standard deviations of top-layer Cu atom heights at a fixed CO coverage of 0.33 ML. The corresponding Raman intensity ratios ( $P_2/P_1$ ) are indicated for each structure.

All structures used in this study are available online at <https://github.com/alexandrova-lab-ucla/Article-Data>
